# Supplementary material
Source: publisher figshare collection journal article supplement (https://geolsoc.figshare.com/ndownloader/files/17619272)
Supplement: Supplementary file 1 [file 17619272]

## Sheet: Table SBK 1
	Zircon U-Pb/Hf and whole-rock Sr-Nd isotopic data of magmatic rocks from the Lohit Plutonic Complex: implication for the Transhimalayan arc magmatism in Eastern Himalayan Syntaxis
	R.K. Bikramadityaa, Sun-Lin Chungb,c, A. Krishnakanta Singhd,*, Hao-Yang Leeb, Te-Hsien Linc, Yoshiyuki Iizukab
	a Department of Geology, Banaras Hindu University, Varanasi 221005, India
	b Institute of Earth Sciences, Academia Sinica, Taipei 11529, Taiwan
	c Department of Geosciences, National Taiwan University, Taipei 10617, Taiwan
	d Wadia Institute of Himalayan Geology, 33 G.M.S. Road, Dehradun 795001, India
	Supplementary Table SBK 1: LA-ICP-MS zircon U-Pb data of the magmatic rocks from Lohit Plutonic Complex, Eastern Himalaya
		U	Th	Th/U	207Pb/206Pb	207Pb/235U	206Pb/238U	207Pb/235U	±1σ	206Pb/238U	±1σ
		(ppm)	(ppm)		(±1σ)	(±1σ)	(±1σ)	(Ma)		(Ma)
	Standard
	GJ-34	­	­	­	0.0603±0.001	0.8120±0.024	0.0975±0.002	603.6	13.48	600	14.81
	GJ-35	­	­	­	0.0598±0.001	0.8066±0.023	0.0977±0.002	600.6	13.41	601.3	14.82
	GJ-36	­	­	­	0.0616±0.001	0.8200±0.024	0.0965±0.002	608.1	13.9	593.9	14.48
	GJ-37	­	­	­	0.0604±0.001	0.8072±0.024	0.09682±0.002	600.9	13.9	595.7	14.52
	GJ-38	­	­	­	0.0589±0.001	0.7971±0.024	0.0980±0.002	595.2	13.95	602.9	14.7
	GJ-39	­	­	­	0.0598±0.001	0.8113±0.025	0.0983±0.002	603.2	14.09	604.7	14.73
	GJ-40	­	­	­	0.0600±0.001	0.8115±0.023	0.0979±0.002	603.3	13.16	602.5	14.78
	GJ-41	­	­	­	0.0602±0.001	0.8072±0.023	0.0972±0.002	600.9	13.17	598.3	14.68
	GJ--42	­	­	­	0.0600±0.001	0.8026±0.025	0.0968±0.002	598.3	14.29	596.2	14.67
	GJ--43	­	­	­	0.0601±0.001	0.8159±0.026	0.0983±0.002	605.8	14.54	604.6	14.87
	95100-18	­	­	­	0.0740±0.002	1.8688±0.060	0.1831±0.004	1070.1	21.39	1084.4	26.03
	95100-22	­	­	­	0.0741±0.002	1.8463±0.058	0.1806±0.004	1062.1	20.79	1070.7	25.6
	PLS-12	­	­	­	0.0520±0.001	0.3866±0.011	0.0538±0.001	331.9	8.43	338.2	8.48
	PLS-14	­	­	­	0.0522±0.001	0.3904±0.011	0.0542±0.001	334.7	8.46	340.3	8.51
	2TH17
	2TH17-01	105	81	0.767	0.0432±0.008	0.0940±0.020	0.0158±0.001	91	19	101	3
	2TH17-02	103	75	0.729	0.0570±0.008	0.1246±0.021	0.0159±0.001	119	19	101	3
	2TH17-03	89	54	0.607	0.0308±0.010	0.0674±0.025	0.0159±0.001	66	24	102	4
	2TH17-04	92	57	0.626	0.0418±0.009	0.0923±0.023	0.0160±0.001	90	21	102	3
	2TH17-05	101	62	0.618	0.0814±0.008	0.1723±0.023	0.0154±0.001	161	20	98	3
	2TH17-06	87	38	0.43	0.0684±0.010	0.1511±0.026	0.0160±0.001	143	23	102	4
	2TH17-07	96	67	0.699	0.0406±0.009	0.0911±0.023	0.0163±0.001	89	22	104	3
	2TH17-08	155	127	0.816	0.0434±0.005	0.0964±0.014	0.0161±0.000	93	13	103	3
	2TH17-09	76	43	0.567	0.0407±0.012	0.0902±0.029	0.0161±0.001	88	27	103	4
	2TH17-10	116	99	0.85	0.0370±0.007	0.0850±0.020	0.0167±0.001	83	18	107	3
	2TH17-11	123	93	0.756	0.0395±0.007	0.0881±0.019	0.0162±0.001	86	17	104	3
	2TH17-12	138	80	0.58	0.0490±0.006	0.1062±0.017	0.0157±0.000	102	15	101	3
	2TH17-13	100	74	0.745	0.0546±0.008	0.1203±0.022	0.0160±0.001	115	20	102	3
	2TH17-14	91	63	0.689	0.0477±0.010	0.1094±0.026	0.0167±0.001	105	24	106	4
	2TH17-15	64	31	0.477	0.0688±0.012	0.1609±0.034	0.0170±0.001	152	30	108	4
	2TH17-16	144	114	0.791	0.0435±0.006	0.0948±0.016	0.0158±0.000	92	14	101	3
	2TH17-17	130	69	0.531	0.0404±0.007	0.0878±0.019	0.0158±0.001	85	17	101	3
	2TH17-18	120	66	0.551	0.0415±0.008	0.0894±0.019	0.0156±0.001	87	18	100	3
	2TH17-19	88	54	0.607	0.0585±0.010	0.1294±0.026	0.0160±0.001	124	23	103	4
	2TH17-20	142	104	0.729	0.0450±0.006	0.0942±0.016	0.0152±0.000	91	14	97	3
	2TH17-21	103	53	0.513	0.0386±0.008	0.0867±0.021	0.0163±0.001	84	20	104	3
	2TH17-22	130	75	0.576	0.0489±0.006	0.1080±0.017	0.0160±0.001	104	16	102	3
	2TH17-23	84	54	0.642	0.0445±0.011	0.0993±0.027	0.0162±0.001	96	25	104	4
	2TH17-24	90	48	0.534	0.0700±0.012	0.1464±0.029	0.0152±0.001	139	26	97	4
	Mean	107	70	0.643	0.0489±0.009	0.1077±0.022	0.0160±0.001	104	20.2	102	3.3
	2TH20
	2TH20-01	66	31	0.474	0.0644±0.012	0.1522±0.032	0.0171±0.001	144	28	109	4
	2TH20-02	40	14	0.358	0.0160±0.022	0.0367±0.053	0.0166±0.001	37	52	106	5
	2TH20-03	95	59	0.626	0.0343±0.009	0.0778±0.023	0.0164±0.001	76	22	105	3
	2TH20-04	76	42	0.554	0.0295±0.012	0.0673±0.029	0.0165±0.001	66	27	106	4
	2TH20-05	70	40	0.56	0.0253±0.013	0.0577±0.030	0.0165±0.001	57	29	106	4
	2TH20-06	102	65	0.634	0.0439±0.008	0.1023±0.021	0.0169±0.001	99	19	108	3
	2TH20-07	163	51	0.311	0.0321±0.005	0.0750±0.013	0.0170±0.000	73	13	108	3
	2TH20-08	36	13	0.364	0.0730±0.023	0.1630±0.059	0.0162±0.001	153	51	104	5
	2TH20-09	56	26	0.47	0.0348±0.015	0.0791±0.038	0.0165±0.001	77	36	105	4
	2TH20-10	83	49	0.59	0.0448±0.010	0.1057±0.026	0.0171±0.001	102	24	109	4
	2TH20-11	115	70	0.607	0.0473±0.007	0.1102±0.019	0.0169±0.001	106	17	108	3
	2TH20-12	104	58	0.554	0.0490±0.009	0.1098±0.023	0.0162±0.001	106	21	104	3
	2TH20-13	55	26	0.472	0.0923±0.013	0.2145±0.039	0.0169±0.001	197	32	108	4
	2TH20-14	55	30	0.545	0.0811±0.015	0.1732±0.039	0.0155±0.001	162	34	99	4
	2TH20-15	72	46	0.646	0.0690±0.011	0.1624±0.031	0.0171±0.001	153	27	109	4
	2TH20-16	101	63	0.618	0.0572±0.008	0.1350±0.022	0.0171±0.001	129	20	109	3
	2TH20-17	180	97	0.54	0.0527±0.004	0.1213±0.013	0.0167±0.000	116	12	107	3
	2TH20-18	74	45	0.604	0.0578±0.010	0.1384±0.029	0.0174±0.001	132	26	111	4
	2TH20-19	257	131	0.51	0.0436±0.003	0.1014±0.009	0.0169±0.000	98	9	108	3
	2TH20-20	146	92	0.634	0.0470±0.006	0.1074±0.017	0.0166±0.001	104	15	106	3
	2TH20-21	73	46	0.63	0.0524±0.011	0.1228±0.030	0.0170±0.001	118	27	109	4
	2TH20-22	78	41	0.528	0.0433±0.011	0.1001±0.028	0.0168±0.001	97	26	107	4
	2TH20-23	87	49	0.57	0.0518±0.009	0.1181±0.025	0.0165±0.001	113	23	106	4
	2TH20-24	79	48	0.611	0.0588±0.010	0.1343±0.028	0.0166±0.001	128	25	106	4
	Mean	94	51	0.542	0.0501±0.011	0.1152±0.028	0.0167±0.001	110	25.6	107	3.7
	2TH21
	2TH21-01	90	55	0.611	0.0474±0.010	0.1082±0.025	0.0165±0.001	104	23	106	4
	2TH21-02	67	42	0.634	0.0355±0.014	0.0809±0.034	0.0165±0.001	79	32	106	4
	2TH21-03	49	20	0.416	0.0462±0.018	0.1056±0.046	0.0166±0.001	102	42	106	5
	2TH21-04	125	80	0.638	0.0394±0.007	0.0919±0.020	0.0169±0.001	89	18	108	3
	2TH21-05	79	49	0.618	0.0455±0.011	0.1108±0.029	0.0177±0.001	107	26	113	4
	2TH21-06	106	74	0.694	0.0486±0.008	0.1079±0.022	0.0161±0.001	104	20	103	3
	2TH21-07	60	22	0.371	0.0526±0.014	0.1216±0.038	0.0168±0.001	116	34	107	4
	2TH21-08	60	31	0.513	0.0470±0.015	0.1101±0.038	0.0170±0.001	106	35	109	4
	2TH21-09	341	119	0.349	0.0437±0.002	0.0990±0.008	0.0165±0.000	96	7	105	3
	2TH21-10	118	78	0.658	0.0400±0.007	0.0931±0.020	0.0169±0.001	90	18	108	3
	2TH21-11	67	29	0.432	0.0429±0.013	0.0988±0.033	0.0167±0.001	96	31	107	4
	2TH21-12	101	63	0.618	0.0543±0.008	0.1298±0.023	0.0173±0.001	124	21	111	4
	2TH21-13	67	28	0.421	0.0466±0.013	0.1120±0.034	0.0174±0.001	108	31	111	4
	2TH21-14	137	92	0.671	0.0436±0.006	0.0999±0.016	0.0166±0.001	97	15	106	3
	2TH21-15	90	58	0.646	0.0519±0.010	0.1179±0.025	0.0165±0.001	113	23	105	4
	2TH21-16	105	41	0.394	0.0456±0.008	0.1072±0.022	0.0171±0.001	103	20	109	3
	2TH21-17	99	66	0.667	0.0477±0.008	0.1139±0.023	0.0173±0.001	110	21	111	4
	2TH21-18	96	51	0.534	0.0693±0.009	0.1567±0.025	0.0164±0.001	148	22	105	4
	2TH21-19	88	55	0.626	0.0530±0.010	0.1171±0.025	0.0160±0.001	112	23	103	3
	2TH21-20	175	41	0.238	0.0423±0.005	0.0992±0.013	0.0170±0.000	96	12	109	3
	2TH21-21	108	64	0.593	0.0345±0.008	0.0802±0.021	0.0168±0.001	78	20	108	3
	2TH21-22	76	45	0.586	0.0319±0.011	0.0753±0.029	0.0171±0.001	74	28	109	4
	2TH21-23	59	28	0.481	0.0640±0.014	0.1496±0.039	0.0170±0.001	142	34	108	4
	2TH21-24	65	35	0.528	0.0247±0.014	0.0576±0.034	0.0169±0.001	57	33	108	4
	Mean	101	53	0.539	0.0458±0.010	0.1060±0.027	0.0168±0.001	102	24.5	108	3.7
	2TH22
	2TH22-01	61	40	0.658	0.0499±0.012	0.1212±0.034	0.0176±0.001	116	31	113	4
	2TH22-02	114	86	0.75	0.0540±0.007	0.1231±0.019	0.0165±0.001	118	17	106	3
	2TH22-03	48	28	0.573	0.0689±0.017	0.1551±0.045	0.0163±0.001	146	39	104	5
	2TH22-04	47	30	0.638	0.0377±0.020	0.0780±0.045	0.0150±0.001	76	43	96	4
	2TH22-05	74	55	0.739	0.0413±0.011	0.0942±0.029	0.0165±0.001	91	27	106	4
	2TH22-06	58	40	0.685	0.0673±0.014	0.1555±0.037	0.0168±0.001	147	32	107	4
	2TH22-07	58	25	0.436	0.0503±0.015	0.1114±0.037	0.0161±0.001	107	34	103	4
	2TH22-08	66	48	0.723	0.0516±0.013	0.1187±0.033	0.0167±0.001	114	30	107	4
	2TH22-09	56	36	0.65	0.0619±0.014	0.1491±0.039	0.0175±0.001	141	35	112	4
	2TH22-10	65	48	0.739	0.0519±0.013	0.1244±0.034	0.0174±0.001	119	31	111	4
	2TH22-11	64	47	0.745	0.0198±0.014	0.0466±0.034	0.0171±0.001	46	33	109	4
	2TH22-12	66	42	0.642	0.0342±0.013	0.0819±0.033	0.0174±0.001	80	31	111	4
	2TH22-13	59	42	0.708	0.0375±0.015	0.0837±0.037	0.0162±0.001	82	35	103	4
	2TH22-14	64	45	0.708	0.0684±0.012	0.1658±0.034	0.0176±0.001	156	30	112	4
	2TH22-15	98	71	0.723	0.0515±0.009	0.1178±0.023	0.0166±0.001	113	21	106	3
	2TH22-16	57	37	0.646	0.0755±0.014	0.1806±0.039	0.0174±0.001	169	33	111	4
	2TH22-17	62	44	0.703	0.0541±0.014	0.1228±0.035	0.0165±0.001	118	32	105	4
	2TH22-18	53	31	0.59	0.0373±0.016	0.0865±0.041	0.0168±0.001	84	38	107	4
	2TH22-19	70	45	0.638	0.0314±0.013	0.0704±0.032	0.0163±0.001	69	30	104	4
	2TH22-20	66	45	0.675	0.0325±0.013	0.0754±0.033	0.0168±0.001	74	32	108	4
	2TH22-21	51	32	0.622	0.0087±0.019	0.0192±0.043	0.0161±0.001	19	43	103	4
	2TH22-22	105	74	0.708	0.0433±0.008	0.1003±0.022	0.0168±0.001	97	20	107	3
	2TH22-23	59	41	0.685	0.0490±0.014	0.1130±0.037	0.0167±0.001	109	34	107	4
	2TH22-24	59	34	0.573	0.0372±0.015	0.0836±0.037	0.0163±0.001	82	34	104	4
	Mean	66	44	0.665	0.0465±0.014	0.1074±0.035	0.0167±0.001	103	31.9	107	3.9
	RD1
	RD1-01	156	76	0.486	0.0525±0.004	0.1654±0.017	0.0229±0.001	155	14	146	4
	RD1-02	143	64	0.449	0.0524±0.004	0.1641±0.017	0.0227±0.001	154	15	145	4
	RD1-03	379	372	0.981	0.0429±0.002	0.1314±0.008	0.0222±0.001	125	7	142	4
	RD1-04	115	58	0.5	0.0519±0.005	0.1611±0.020	0.0225±0.001	152	17	143	4
	RD1-05	100	42	0.423	0.0481±0.006	0.1534±0.024	0.0231±0.001	145	21	147	5
	RD1-06	329	292	0.887	0.0397±0.002	0.1239±0.008	0.0227±0.001	119	8	144	4
	RD1-07	126	57	0.447	0.0418±0.005	0.1302±0.018	0.0226±0.001	124	17	144	4
	RD1-08	187	111	0.593	0.0308±0.004	0.0932±0.013	0.0220±0.001	91	12	140	4
	RD1-09	275	171	0.622	0.0421±0.002	0.1323±0.010	0.0228±0.001	126	9	145	4
	RD1-10	133	62	0.468	0.0570±0.004	0.1792±0.018	0.0228±0.001	167	16	145	4
	RD1-11	199	121	0.611	0.0433±0.003	0.1411±0.013	0.0237±0.001	134	11	151	4
	RD1-12	326	231	0.708	0.0445±0.002	0.1362±0.009	0.0222±0.001	130	8	142	4
	RD1-13	106	50	0.47	0.0530±0.005	0.1686±0.021	0.0231±0.001	158	19	147	4
	RD1-14	266	155	0.583	0.0505±0.002	0.1586±0.010	0.0228±0.001	150	9	145	4
	RD1-15	151	76	0.507	0.0453±0.004	0.1405±0.016	0.0225±0.001	134	14	143	4
	RD1-16	145	63	0.436	0.0496±0.004	0.1523±0.017	0.0223±0.001	144	15	142	4
	RD1-17	402	313	0.779	0.0462±0.001	0.1410±0.007	0.0221±0.001	134	7	141	4
	RD1-18	144	75	0.52	0.0530±0.004	0.1625±0.017	0.0222±0.001	153	15	142	4
	RD1-19	159	86	0.543	0.0428±0.004	0.1350±0.015	0.0229±0.001	129	14	146	4
	RD1-20	149	82	0.554	0.0441±0.004	0.1435±0.017	0.0236±0.001	136	15	151	4
	RD1-21	124	59	0.477	0.0392±0.005	0.1253±0.019	0.0232±0.001	120	17	148	4
	RD1-22	218	161	0.739	0.0400±0.003	0.1254±0.012	0.0228±0.001	120	11	145	4
	RD1-23	212	109	0.515	0.0416±0.003	0.1276±0.012	0.0223±0.001	122	11	142	4
	RD1-24	1573	379	0.241	0.0451±0.001	0.1363±0.005	0.0219±0.001	130	4	140	4
	Mean	255	136	0.564	0.0457±0.003	0.1428±0.014	0.0227±0.001	136	12.8	144	4
	RD3
	RD3-01	184	168	0.911	0.0399±0.005	0.0792±0.011	0.0144±0.000	77	10	92	3
	RD3-02	242	252	1.041	0.0489±0.004	0.0931±0.009	0.0138±0.000	90	8	88	2
	RD3-03	448	634	1.417	0.0466±0.002	0.0907±0.005	0.0141±0.000	88	5	90	2
	RD3-04	578	831	1.437	0.0449±0.001	0.0869±0.004	0.0140±0.000	85	4	90	2
	RD3-05	158	121	0.761	0.0627±0.005	0.1233±0.013	0.0143±0.000	118	12	91	3
	RD3-06	426	595	1.397	0.0451±0.002	0.0870±0.006	0.0140±0.000	85	5	90	2
	RD3-07	556	746	1.342	0.0434±0.001	0.0846±0.004	0.0141±0.000	82	4	91	2
	RD3-08	256	272	1.063	0.0459±0.003	0.0885±0.008	0.0140±0.000	86	8	89	2
	RD3-09	202	182	0.903	0.0507±0.006	0.0956±0.014	0.0137±0.000	93	13	88	2
	RD3-10	317	351	1.109	0.0508±0.003	0.0981±0.007	0.0140±0.000	95	7	90	2
	RD3-11	254	254	1	0.0374±0.004	0.0724±0.009	0.0141±0.000	71	8	90	2
	RD3-12	361	413	1.146	0.0482±0.002	0.0931±0.007	0.0140±0.000	90	6	90	2
	RD3-13	315	353	1.121	0.0450±0.003	0.0881±0.008	0.0142±0.000	86	7	91	2
	RD3-14	556	737	1.325	0.0427±0.002	0.0811±0.005	0.0138±0.000	79	5	88	2
	RD3-15	142	129	0.911	0.0469±0.007	0.0932±0.016	0.0144±0.000	90	14	92	3
	RD3-16	384	490	1.275	0.0460±0.002	0.0898±0.006	0.0142±0.000	87	6	91	2
	RD3-17	222	162	0.729	0.0498±0.004	0.0958±0.011	0.0140±0.000	93	10	89	2
	RD3-18	129	65	0.5	0.0364±0.008	0.0734±0.017	0.0146±0.000	72	16	94	3
	RD3-19	375	504	1.342	0.0429±0.002	0.0831±0.007	0.0141±0.000	81	6	90	2
	RD3-20	200	125	0.622	0.0349±0.005	0.0674±0.011	0.0140±0.000	66	11	90	3
	RD3-21	537	652	1.214	0.0394±0.002	0.0754±0.005	0.0139±0.000	74	5	89	2
	RD3-22	272	334	1.229	0.0488±0.003	0.0990±0.009	0.0147±0.000	96	8	94	3
	RD3-23	405	582	1.437	0.0673±0.002	0.1379±0.007	0.0149±0.000	131	6	95	2
	RD3-24	614	824	1.342	0.0449±0.001	0.0848±0.005	0.0137±0.000	83	4	88	2
	Mean	339	407	1.107	0.0462±0.003	0.0901±0.008	0.0141±0.000	87	7.8	90	2.3
	RD4
	RD4-01	265	229	0.864	0.0541±0.004	0.1059±0.009	0.0142±0.000	102	9	91	3
	RD4-02	447	321	0.718	0.0397±0.002	0.0759±0.006	0.0139±0.000	74	6	89	2
	RD4-03	436	383	0.879	0.0390±0.002	0.0770±0.006	0.0143±0.000	75	5	92	2
	RD4-04	556	289	0.52	0.0430±0.002	0.0836±0.005	0.0141±0.000	82	5	90	2
	RD4-05	337	231	0.685	0.0481±0.003	0.0953±0.007	0.0144±0.000	92	7	92	3
	RD4-06	466	406	0.872	0.0451±0.002	0.0886±0.006	0.0142±0.000	86	5	91	2
	RD4-07	172	124	0.723	0.0399±0.006	0.0770±0.013	0.0140±0.000	75	13	90	3
	RD4-08	469	265	0.567	0.0475±0.002	0.0916±0.006	0.0140±0.000	89	5	90	2
	RD4-09	762	495	0.65	0.0407±0.001	0.0810±0.004	0.0144±0.000	79	4	92	2
	RD4-10	498	345	0.694	0.0475±0.002	0.0934±0.006	0.0143±0.000	91	5	91	2
	RD4-11	672	531	0.791	0.0427±0.001	0.0852±0.005	0.0145±0.000	83	4	93	2
	RD4-12	221	143	0.646	0.0484±0.004	0.0962±0.011	0.0144±0.000	93	10	92	3
	RD4-13	182	136	0.75	0.0576±0.006	0.1130±0.014	0.0142±0.000	109	13	91	3
	RD4-14	359	242	0.675	0.0401±0.003	0.0756±0.008	0.0137±0.000	74	7	88	2
	RD4-15	163	114	0.699	0.0468±0.007	0.0880±0.015	0.0136±0.000	86	14	87	3
	RD4-16	183	93	0.507	0.0478±0.006	0.0908±0.014	0.0138±0.000	88	13	88	3
	RD4-17	530	487	0.919	0.0420±0.002	0.0804±0.006	0.0139±0.000	78	5	89	2
	RD4-18	222	135	0.607	0.0440±0.005	0.0871±0.012	0.0144±0.000	85	11	92	3
	RD4-19	262	113	0.43	0.0487±0.004	0.0923±0.010	0.0138±0.000	90	10	88	3
	RD4-20	159	79	0.498	0.0293±0.007	0.0575±0.016	0.0143±0.000	57	15	91	3
	RD4-21	375	198	0.528	0.0432±0.003	0.0836±0.008	0.0140±0.000	82	7	90	2
	RD4-22	509	472	0.927	0.0383±0.002	0.0746±0.006	0.0141±0.000	73	6	90	2
	RD4-23	764	484	0.634	0.0450±0.001	0.0880±0.005	0.0142±0.000	86	4	91	2
	RD4-24	362	231	0.638	0.0507±0.003	0.1000±0.008	0.0143±0.000	97	7	92	3
	Mean	390	273	0.684	0.0445±0.003	0.0867±0.009	0.0141±0.000	84	7.9	90	2.5
	RD5
	RD5-01	71	29	0.415	0.0170±0.017	0.0335±0.035	0.0143±0.001	33	35	92	4
	RD5-02	56	26	0.459	0.1152±0.033	0.2281±0.078	0.0144±0.001	209	64	92	6
	RD5-03	103	54	0.528	0.0570±0.013	0.1103±0.029	0.0140±0.000	106	27	90	3
	RD5-04	131	94	0.713	0.0316±0.010	0.0594±0.020	0.0137±0.000	59	20	87	3
	RD5-05	66	26	0.388	0.0490±0.019	0.0980±0.041	0.0145±0.001	95	38	93	4
	RD5-06	64	21	0.322	0.0301±0.020	0.0617±0.043	0.0148±0.001	61	41	95	4
	RD5-07	48	17	0.357	0.0272±0.024	0.0584±0.055	0.0156±0.001	58	53	100	5
	RD5-08	57	18	0.308	0.0154±0.027	0.0296±0.052	0.0139±0.001	30	52	89	5
	RD5-09	95	52	0.545	0.0449±0.016	0.0888±0.035	0.0144±0.001	86	32	92	4
	RD5-10	89	40	0.451	0.0547±0.013	0.1114±0.031	0.0148±0.001	107	28	95	3
	RD5-11	97	37	0.382	0.0417±0.016	0.0793±0.033	0.0138±0.001	78	31	88	4
	RD5-12	86	26	0.303	0.0794±0.014	0.1594±0.033	0.0146±0.001	150	29	93	4
	RD5-13	110	47	0.43	0.0540±0.008	0.1099±0.020	0.0148±0.000	106	18	94	3
	RD5-14	102	50	0.495	0.0474±0.010	0.0885±0.022	0.0135±0.000	86	21	87	3
	RD5-15	145	72	0.498	0.0298±0.007	0.0586±0.015	0.0142±0.000	58	14	91	3
	RD5-16	433	66	0.152	0.0439±0.002	0.0956±0.006	0.0158±0.000	93	5	101	3
	RD5-17	69	18	0.263	0.0629±0.014	0.1185±0.030	0.0137±0.001	114	27	88	3
	RD5-18	58	20	0.349	0.0215±0.018	0.0413±0.035	0.0139±0.001	41	34	89	4
	RD5-19	50	16	0.315	0.0396±0.019	0.0781±0.041	0.0143±0.001	76	38	92	4
	RD5-20	60	20	0.327	0.0355±0.015	0.0737±0.034	0.0151±0.001	72	32	96	4
	RD5-21	84	37	0.438	0.0378±0.011	0.0769±0.025	0.0147±0.001	75	23	94	3
	RD5-22	66	30	0.457	0.0239±0.015	0.0480±0.032	0.0146±0.001	48	31	93	3
	RD5-23	91	31	0.34	0.0536±0.013	0.0992±0.027	0.0134±0.000	96	25	86	3
	RD5-24	67	27	0.397	0.0458±0.014	0.0918±0.031	0.0146±0.001	89	29	93	3
	Mean	96	36	0.401	0.0441±0.015	0.0874±0.033	0.0144±0.001	84	31.1	92	3.7
